# Supplementary material for: SAR, Molecular Docking and Molecular Dynamic Simulation of Natural Inhibitors against SARS-CoV-2 Mpro Spike Protein
Source: MDPI journal article supplement (doi:10.3390/molecules29051144), 2024-03-04
Supplement: s1 [file s1]

## Supporting information

for

### SAR, Molecular Docking and Molecular Dynamic Simulation of Natural inhibitors against SARS-CoV-19 Mpro spike protein

Arbutin (P-1)

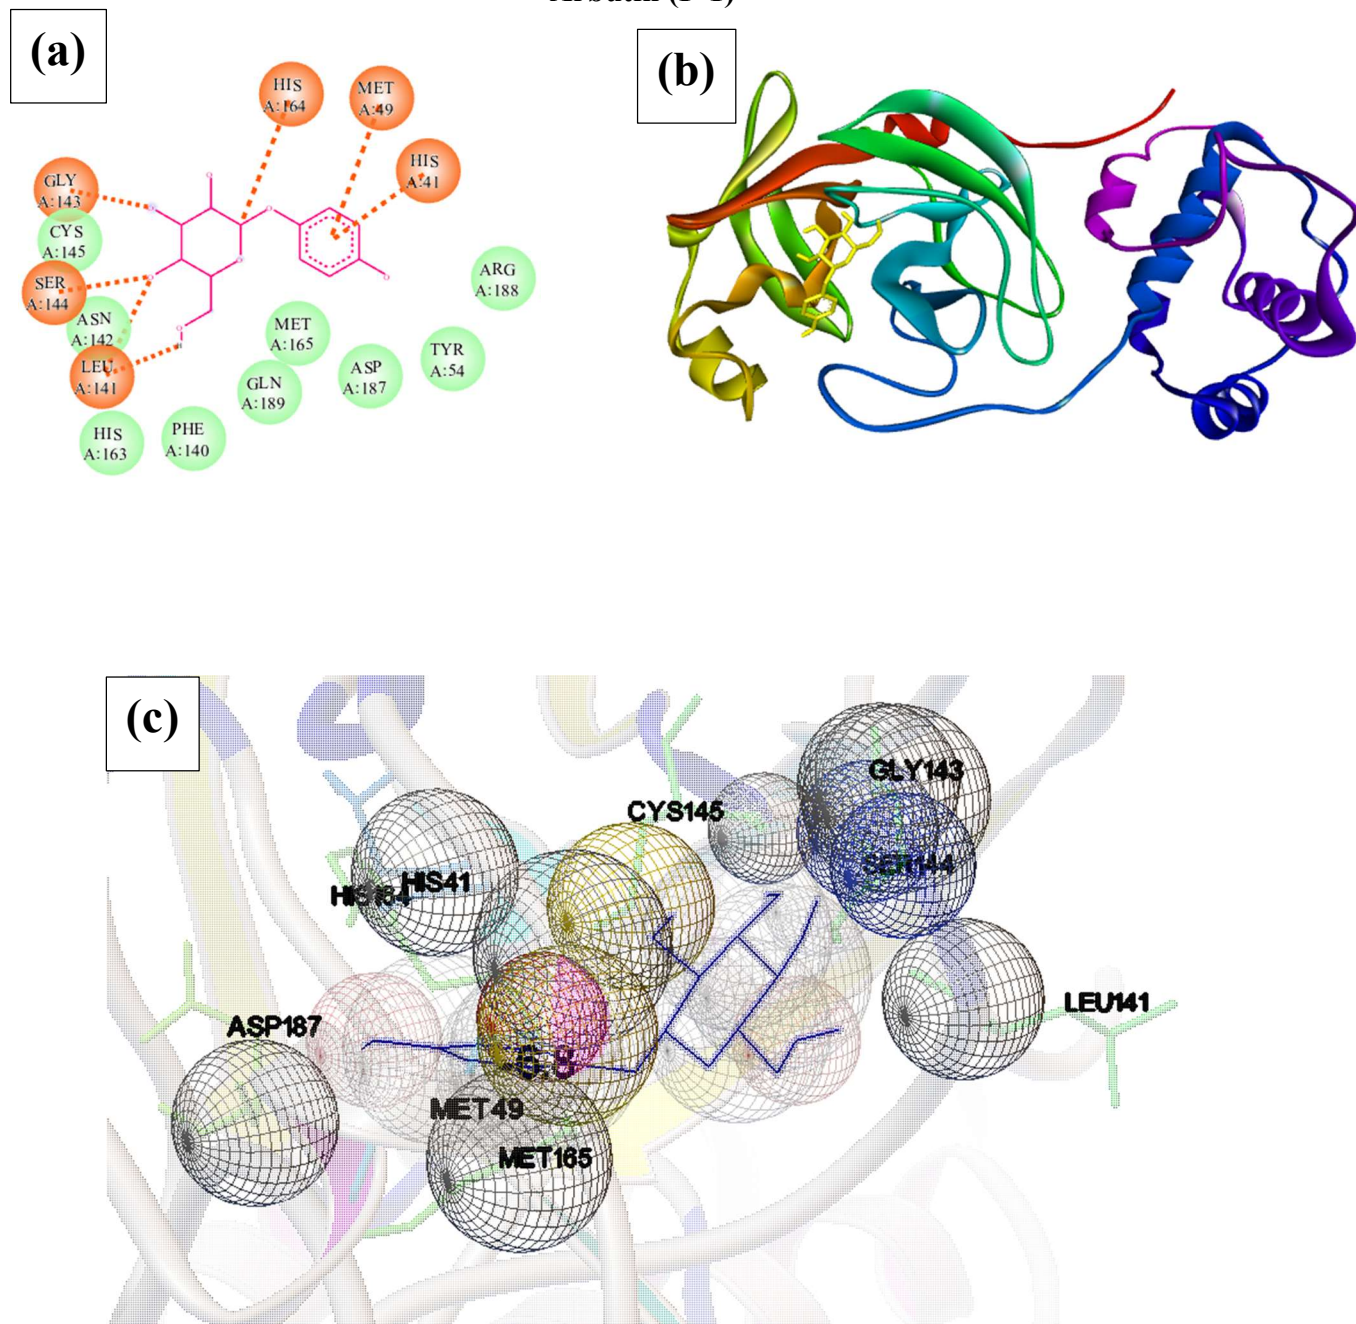

### Carvacrol P-2

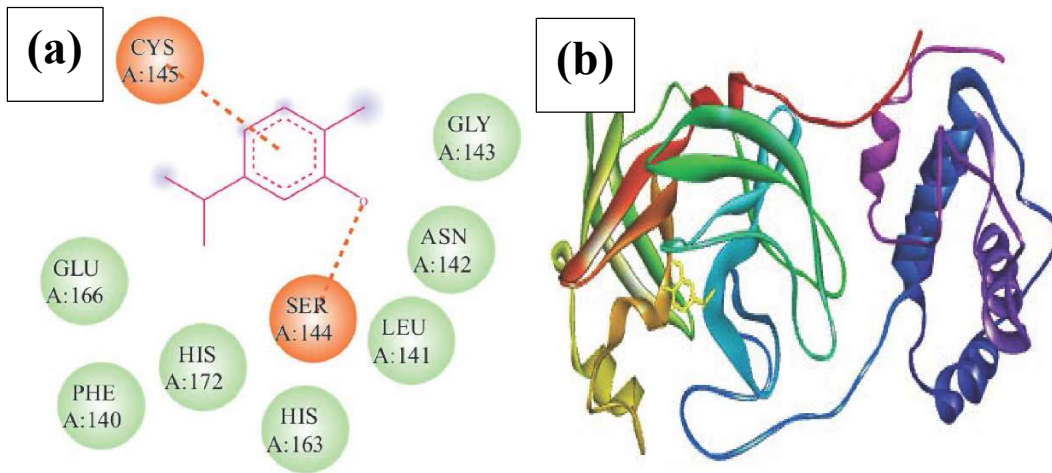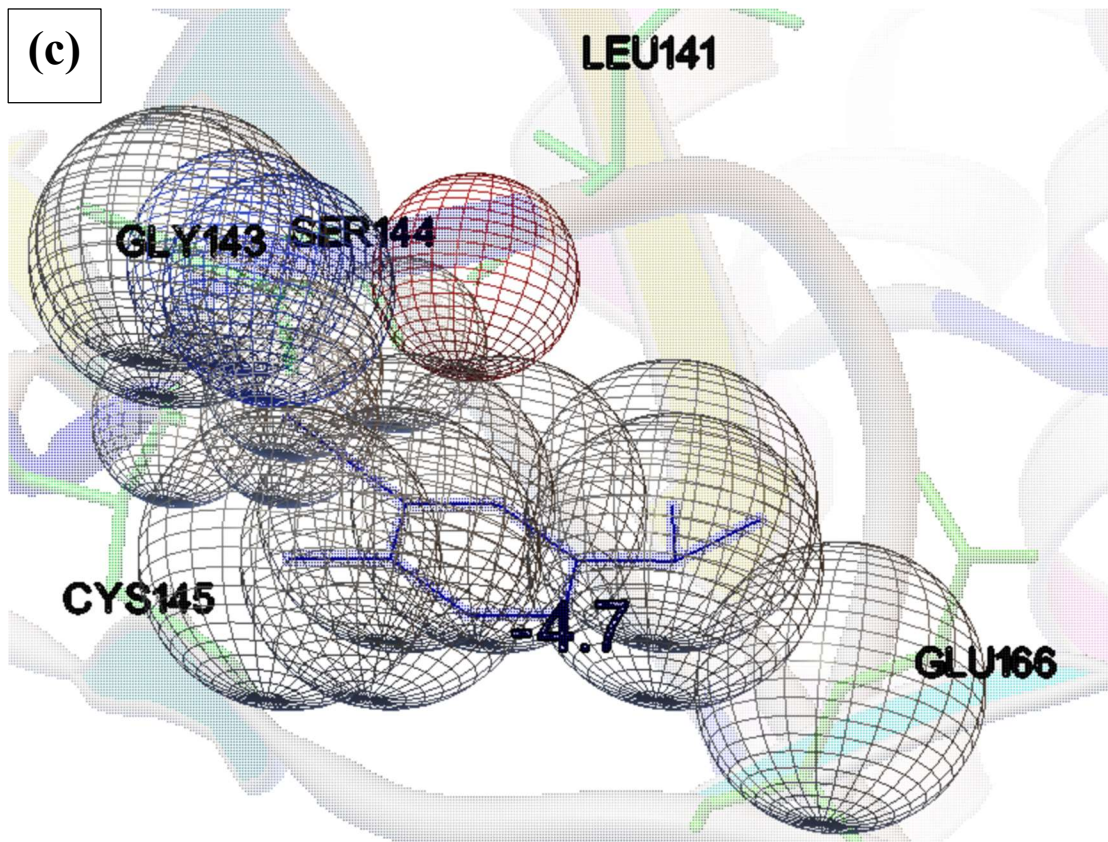



### Coumarin P-3

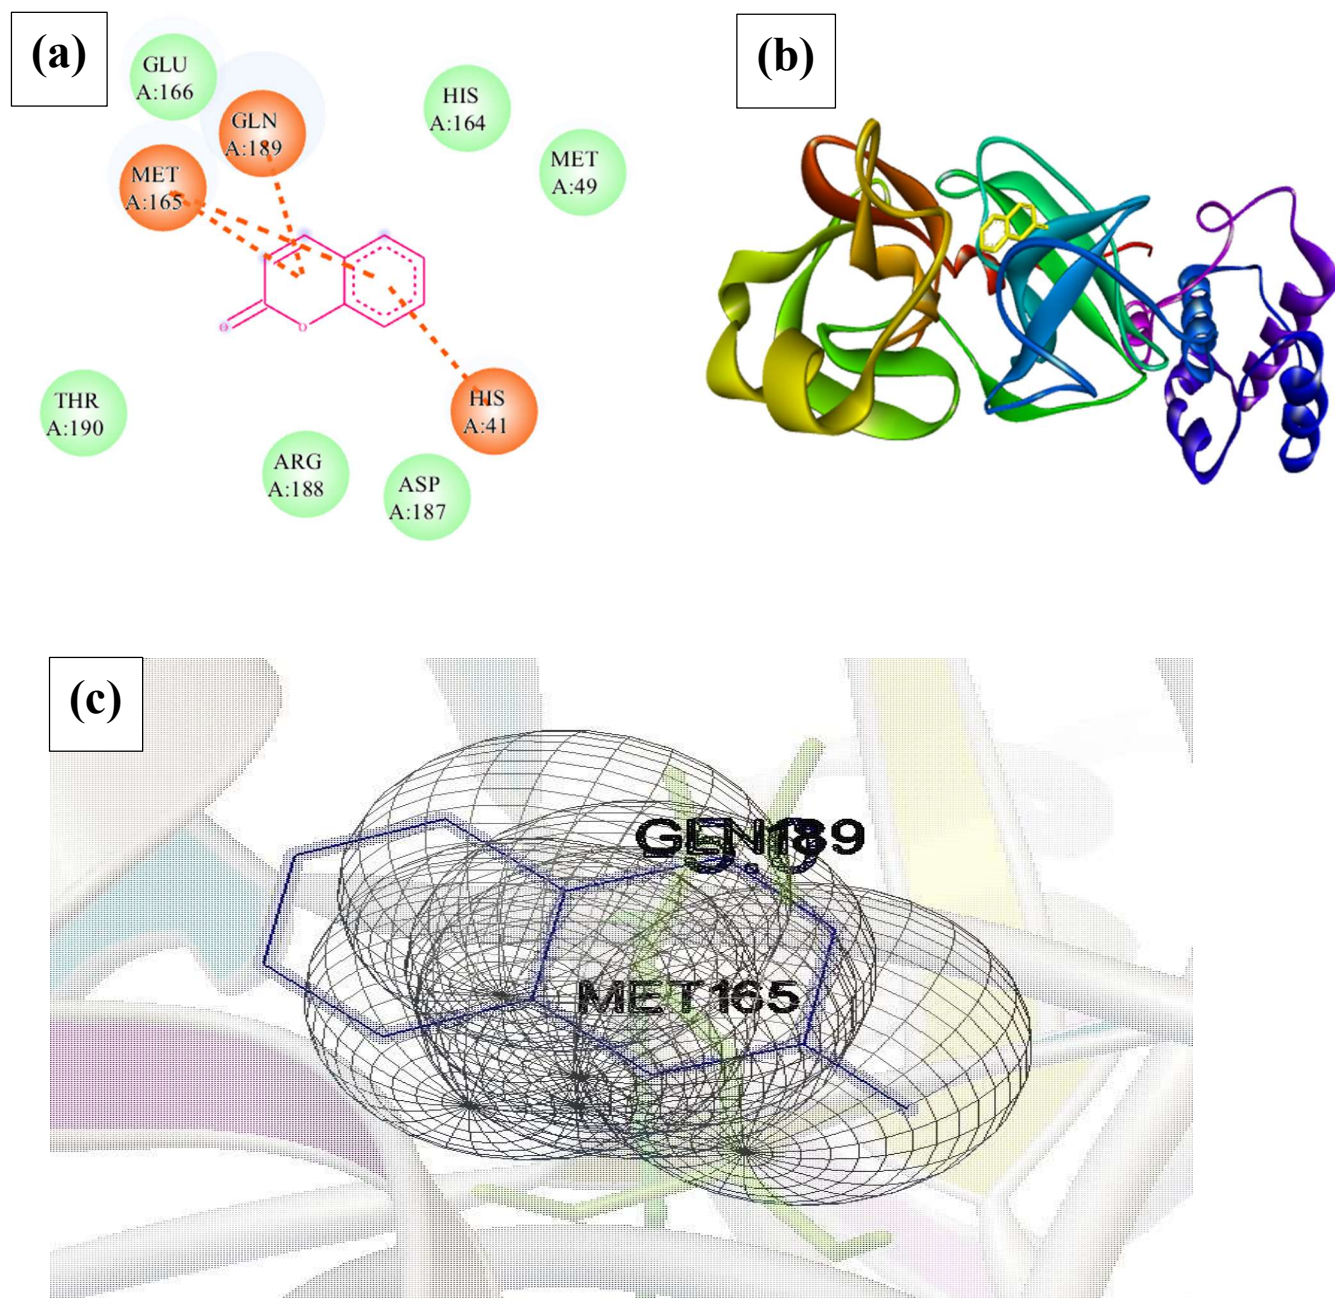

## Catechin P-4

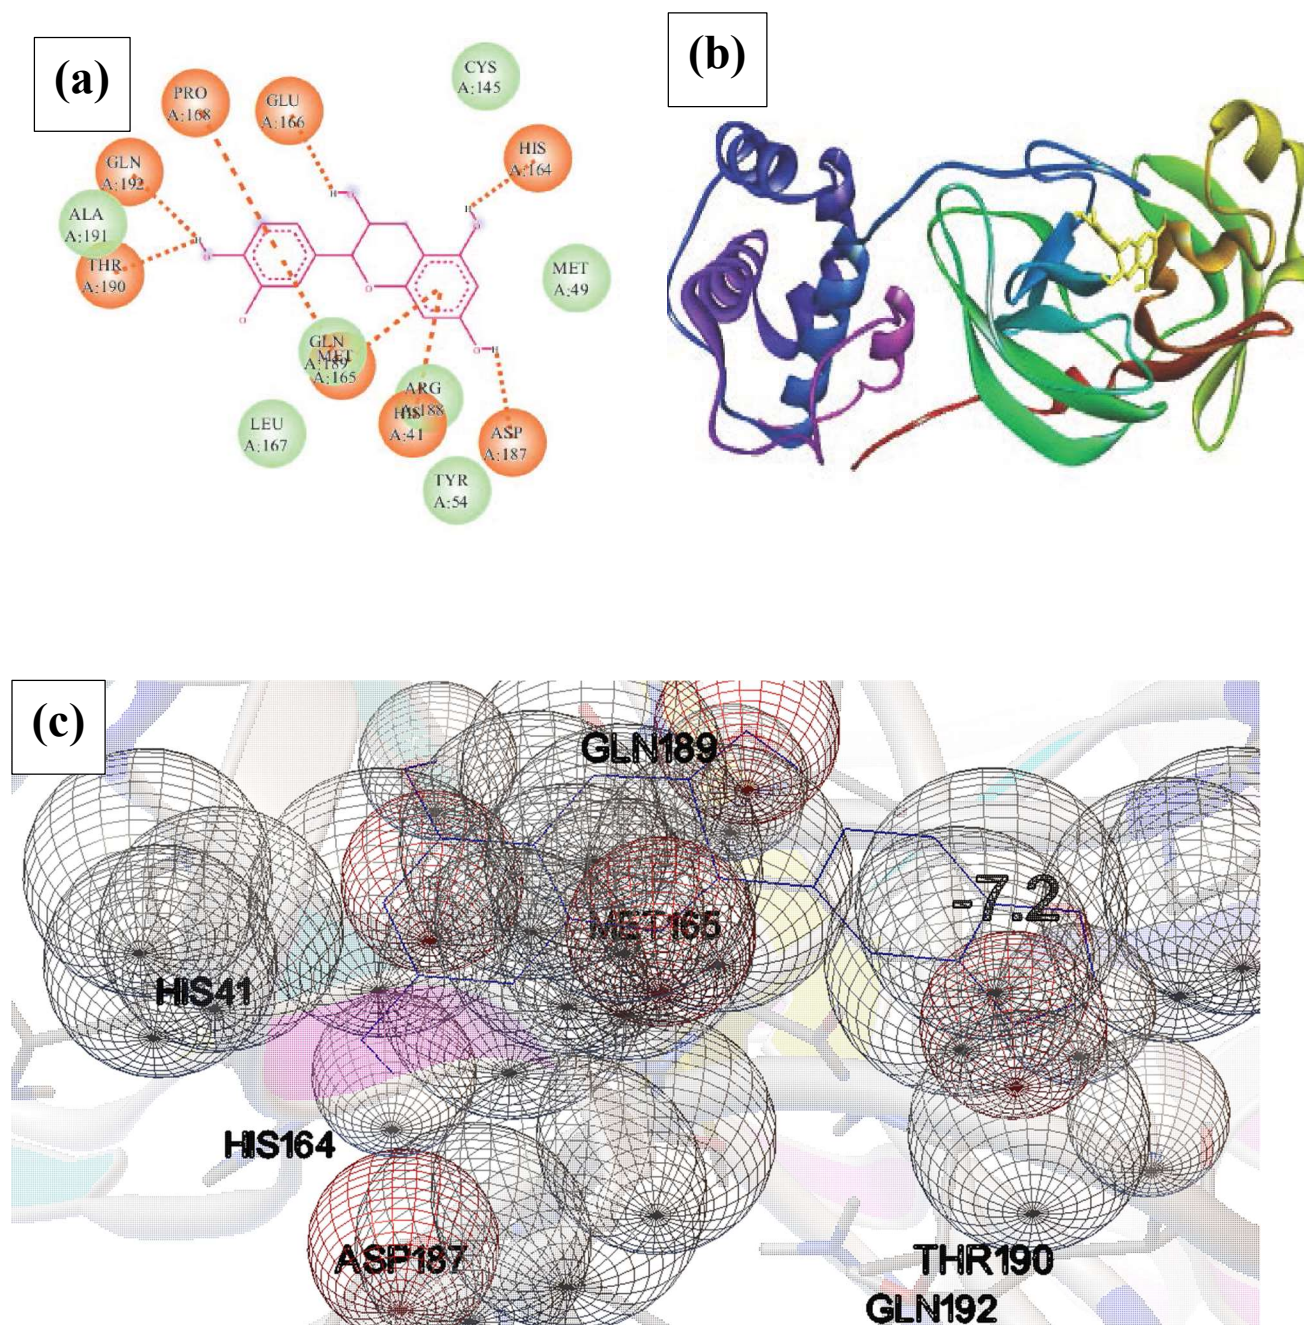



## Harmalol P-5

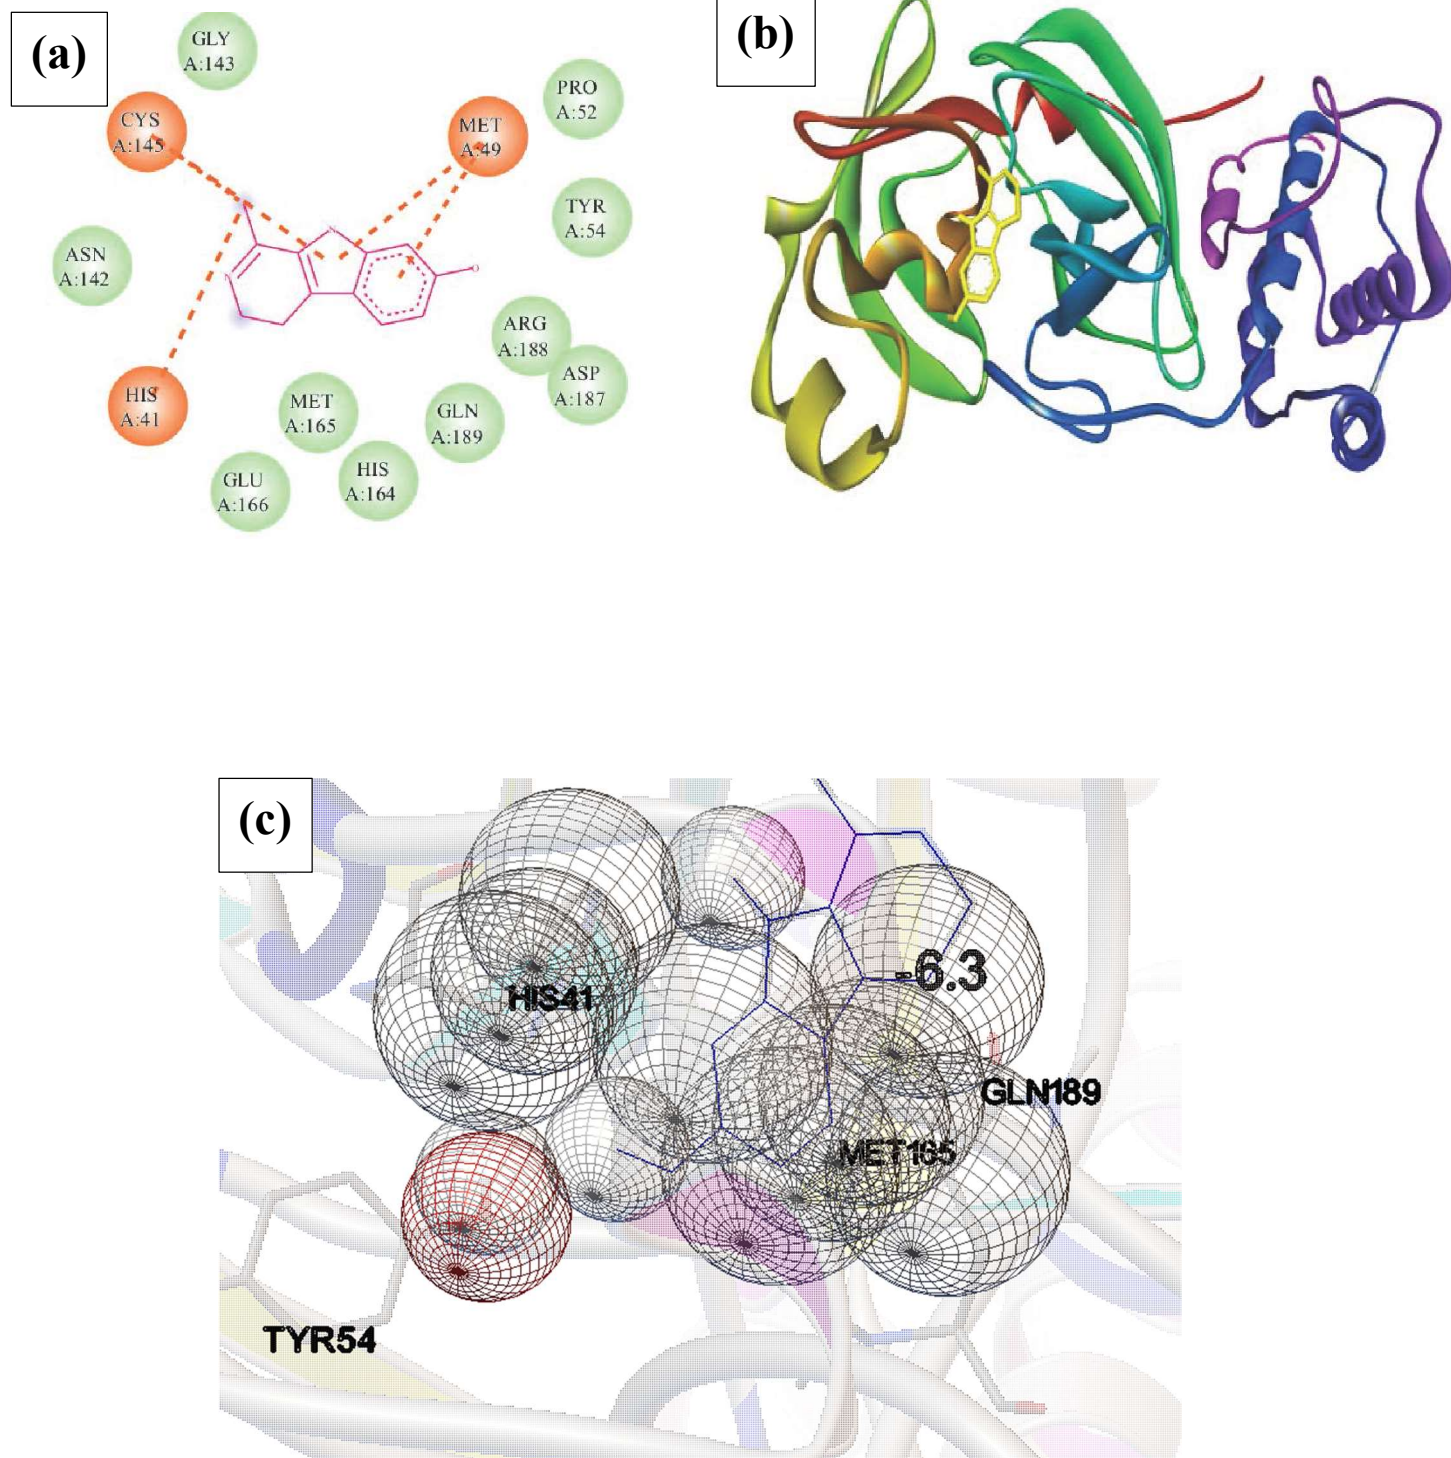

## Harmaline P-6

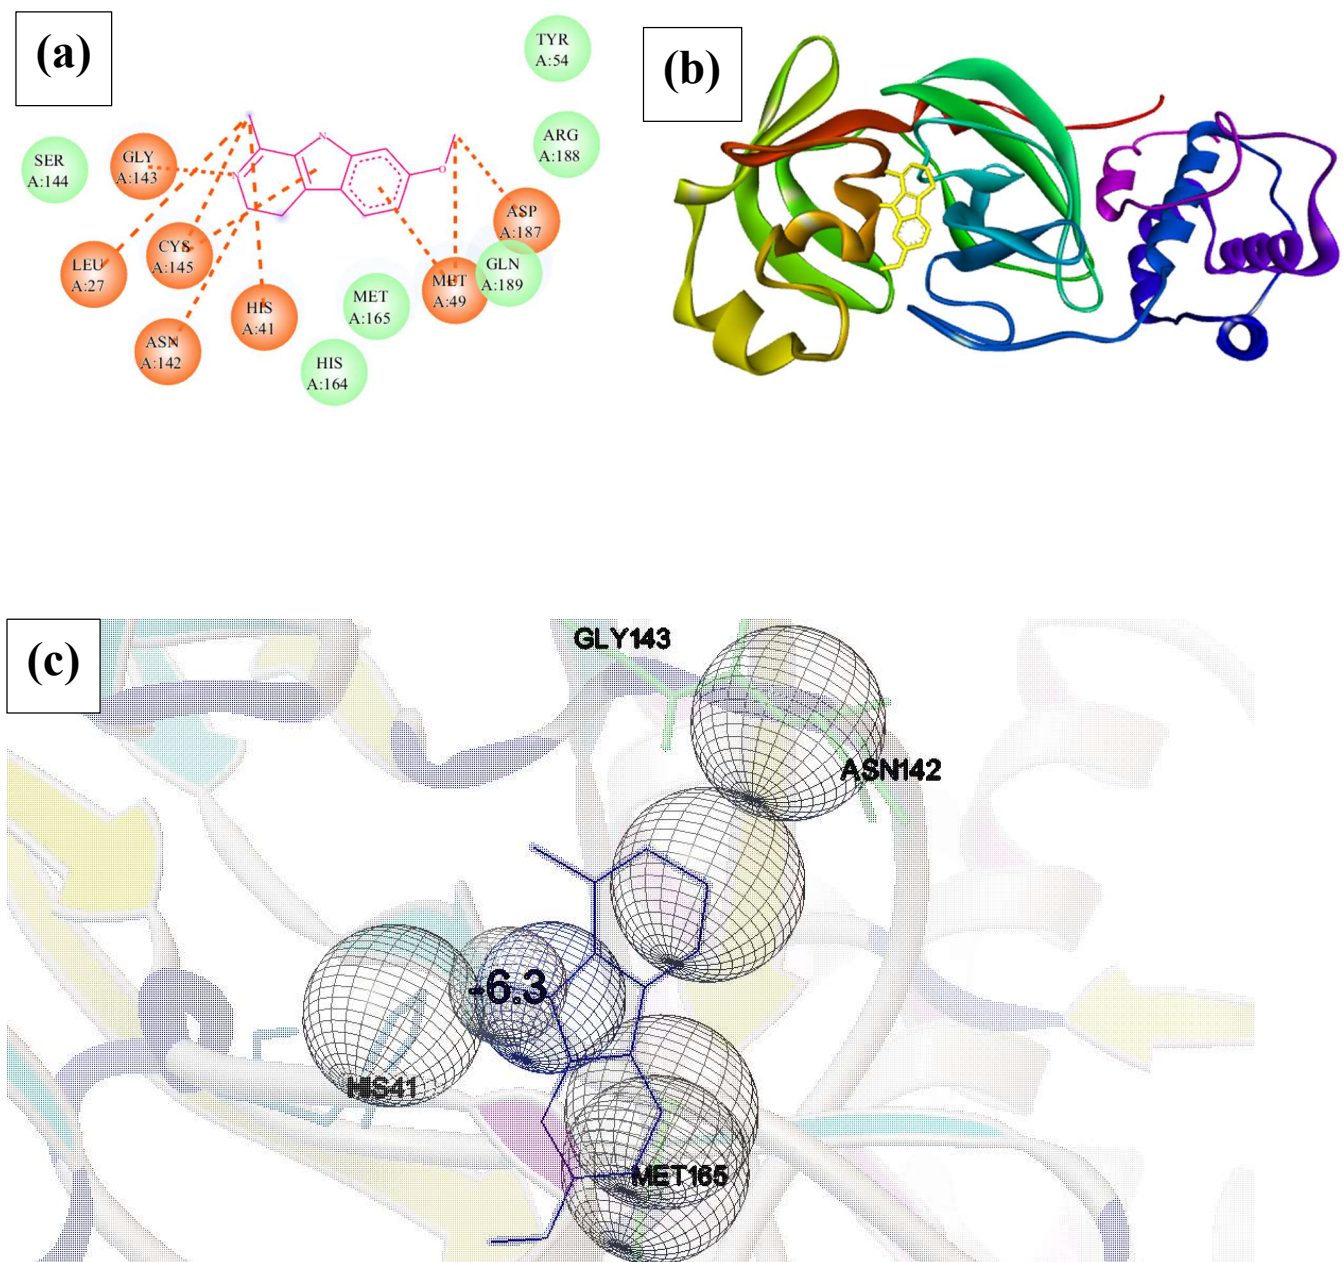



## Quercetin P-8

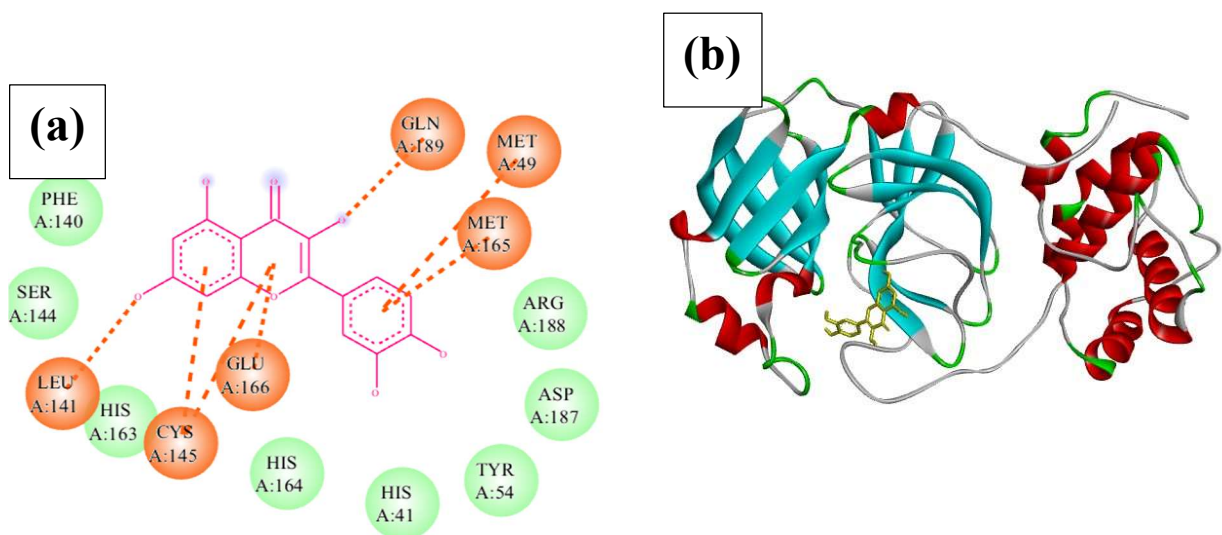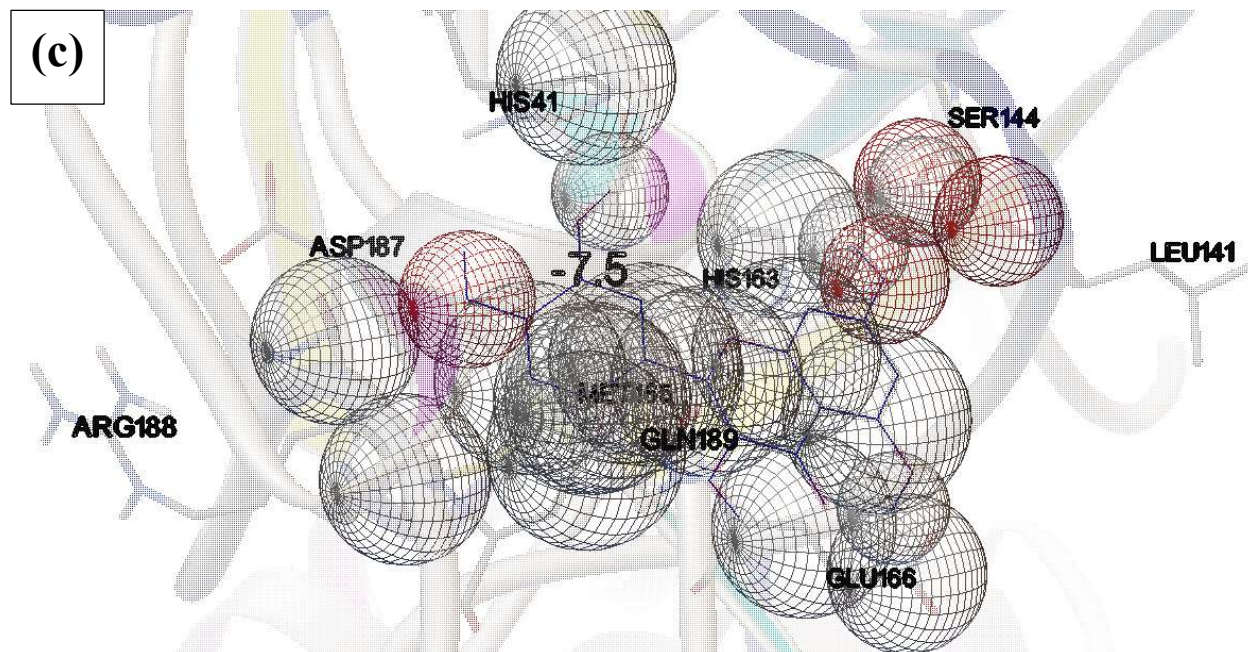

## Vasicine P-9

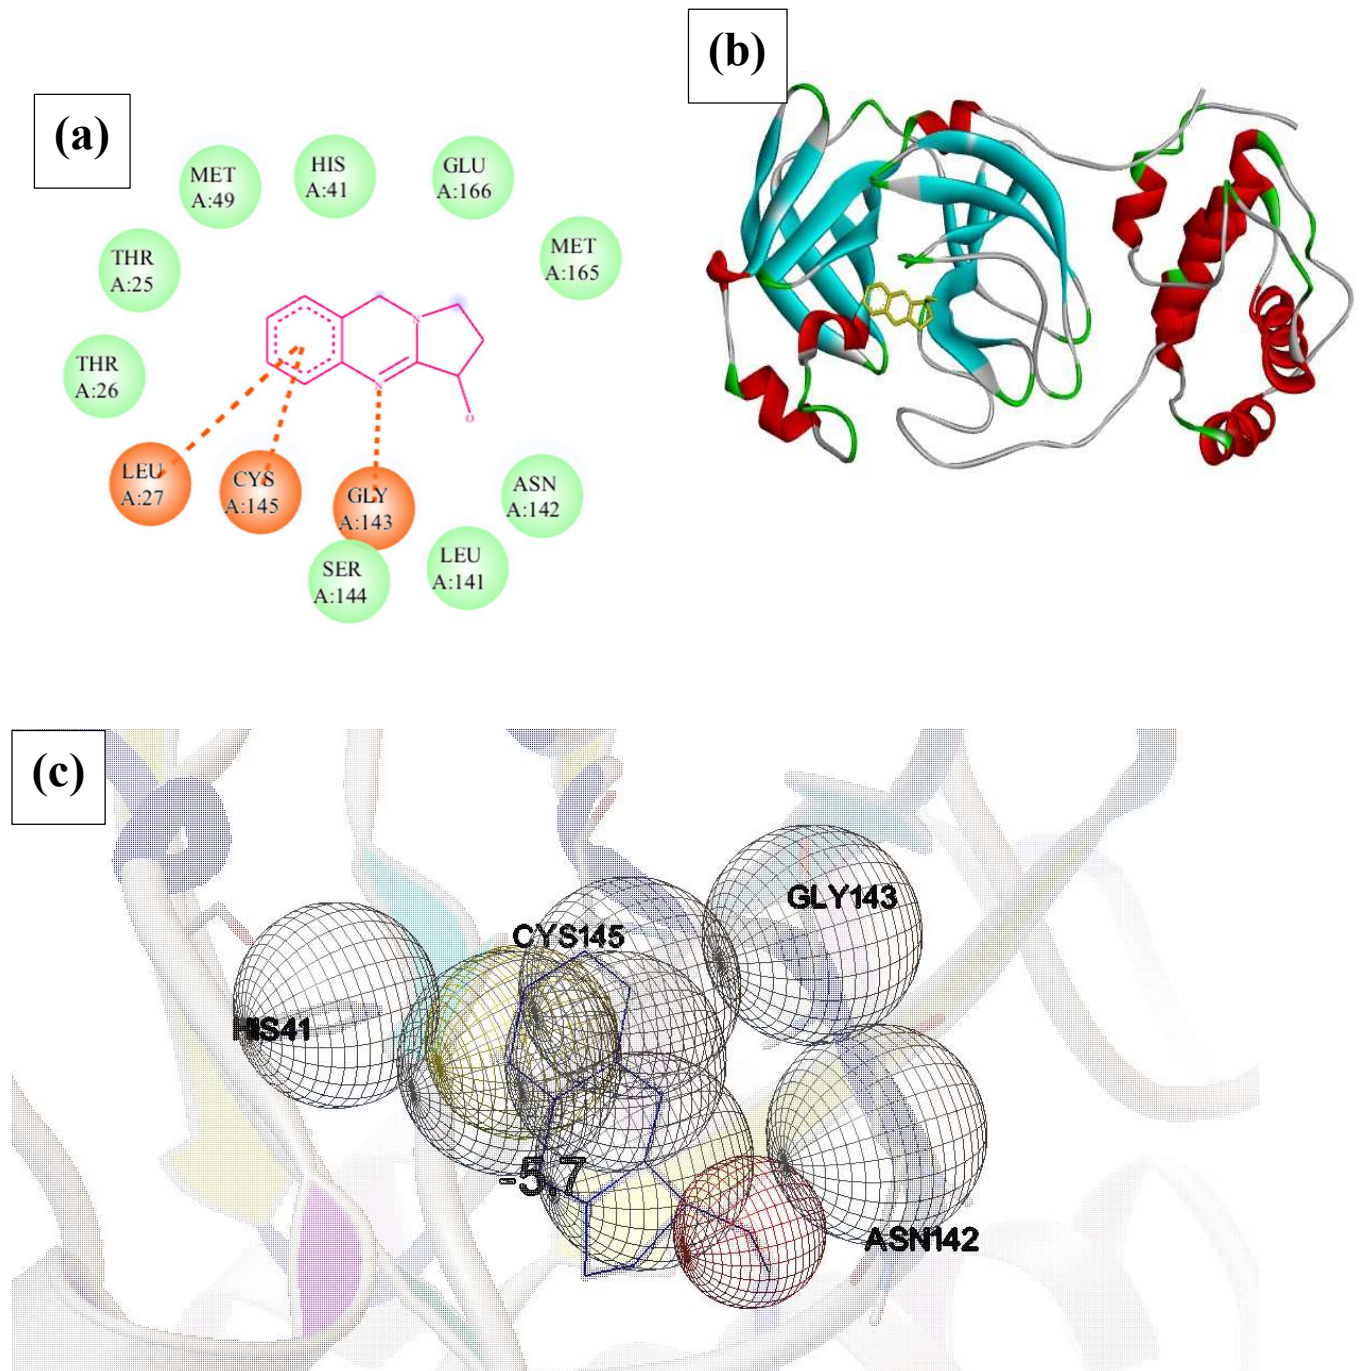



### Vasicinone P-10

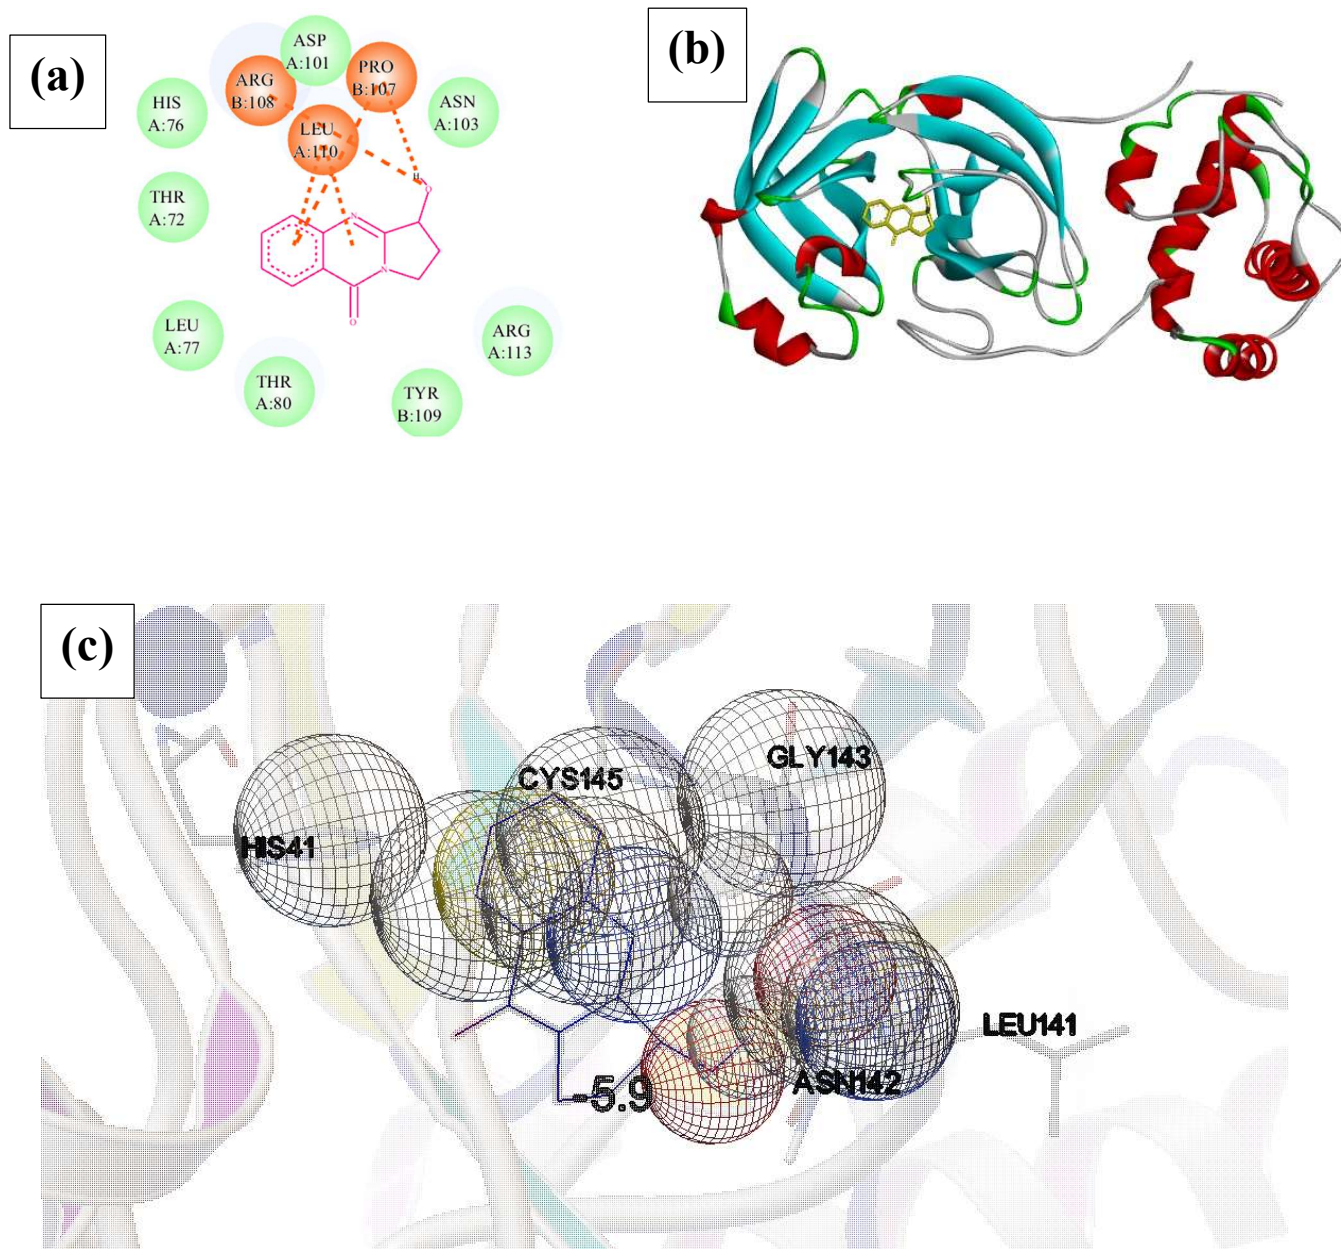

**Fig. SI. 1:** Two-dimensional (a), three-dimensional (b) and residue interactions analysis (c) based structures of **P-1** to **P-10** complexes except for **P7-6LU7** complex.
